# Supplementary material
Source: publisher figshare collection journal article supplement (https://sage.figshare.com/ndownloader/files/17513216)
Supplement: Supplementary file 1 [file 17513216]

# Safety of tiotropium in patients with asthma

UniTinA-asthma®

Tiotropium Respimat® add-on treatment

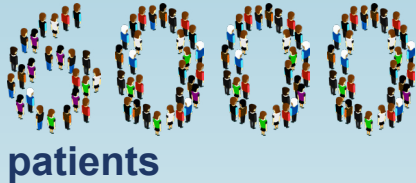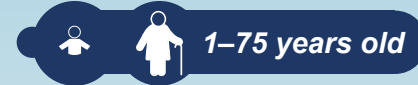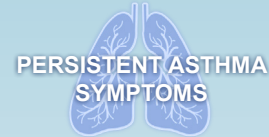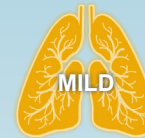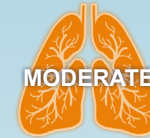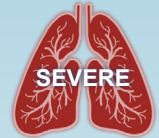

*Proportion of patients reporting AEs is balanced and similar with tiotropium and placebo, irrespective of several baseline characteristics, including age, disease severity, gender and across ethnic groups*

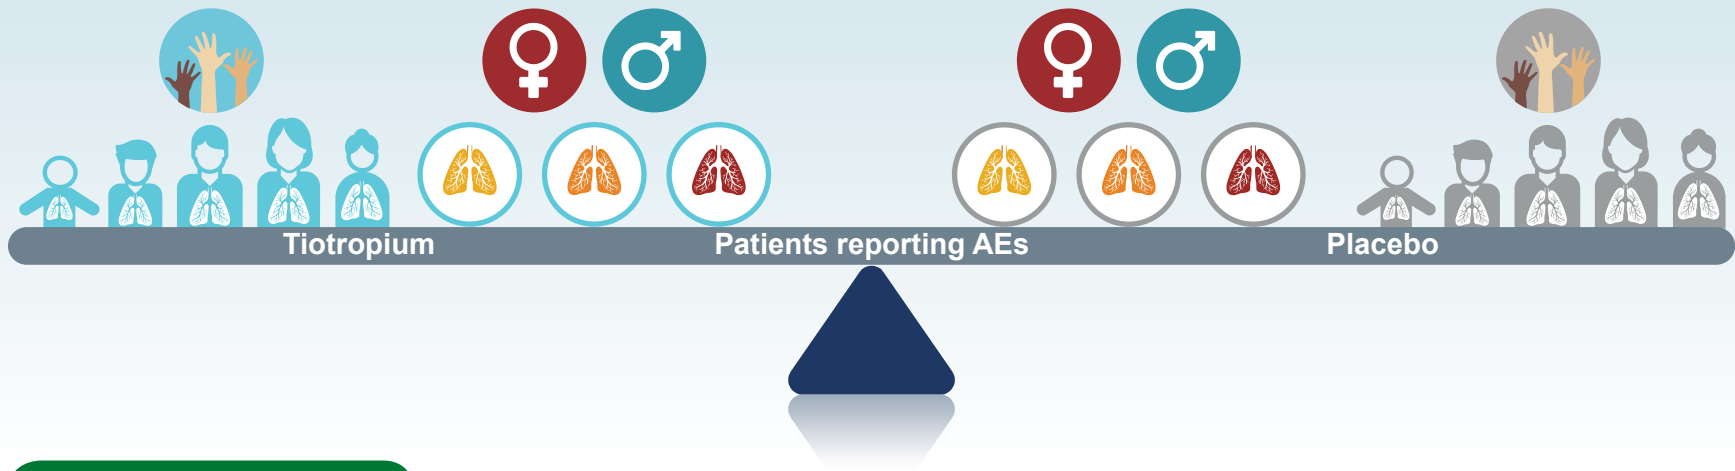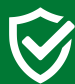

**Safety profile  
comparable  
with placebo**

*In asthma, tiotropium provides a **safe and effective** therapeutic option for the management of symptomatic asthma, irrespective of **age and severity** and across ethnic groups*
